# Supplementary material for: The impact of structural modification of 1,2,4-thiadiazole derivatives on thermodynamics of solubility and hydration processes
Source: Royal Society of Chemistry journal article supplement (doi:10.1039/c5cp03263f), 2015-01-01
Supplement: c5cp03263f1.pdf [file c5cp03263f1.pdf]

## Electronic Supplementary Information

### Impact of structural modification of 1,2,4-thiadiazole derivatives on thermodynamics of solubility and hydration processes

A. O. Surov,<sup>a</sup> C. T. Bui,<sup>a</sup> T. V. Volkova,<sup>a</sup> A. N. Proshin<sup>b</sup> and G. L. Perlovich<sup>a,b,\*</sup>

---

<sup>a.</sup> *Department of Physical Chemistry of Drugs, Krestov's Institute of Solution Chemistry, Russian Academy of Sciences, 153045 Akademicheskaya str. 1, Ivanovo, Russia. E-mail: glp@isc-ras.ru*

<sup>b.</sup> *Department of Computer-Aided Molecular Design, Institute of Physiologically Active Compounds, Russian Academy of Sciences, 142432, Chernogolovka, Russia.*

**Table S1.** Temperature dependencies of solubility,  $X_2$  (mol. fraction), of the compounds **I–VI** in buffer pH 7.4

|                        | <b>I<sup>d</sup></b> | <b>II<sup>d</sup></b> | <b>III<sup>d</sup></b> | <b>IV<sup>e</sup></b> | <b>V<sup>e</sup></b> | <b>VI<sup>e</sup></b> |
|------------------------|----------------------|-----------------------|------------------------|-----------------------|----------------------|-----------------------|
| T, K                   | $x_2 \cdot 10^5$     | $x_2 \cdot 10^5$      | $x_2 \cdot 10^5$       | $x_2 \cdot 10^6$      | $x_2 \cdot 10^5$     | $x_2 \cdot 10^5$      |
| 293.2                  | 7.56                 | 3.47                  | 0.75                   | 2.57                  | 6.01                 | 1.03                  |
| 298.2                  | 9.05                 | 3.95                  | 1.79                   | 3.11                  | 6.13                 | 1.38                  |
| 303.2                  | 10.31                | 4.36                  | 2.00                   | 3.62                  | 6.23                 | 2.15                  |
| 310.2                  | 12.34                | 5.22                  | 2.47                   | 4.38                  | 6.38                 | 3.20                  |
| 315.2                  | 14.63                | 5.60                  | 2.87                   | 5.40                  | 6.51                 | 4.23                  |
| A <sup>a</sup>         | $-0.3 \pm 0.3$       | $-3.2 \pm 0.2$        | $-2.3 \pm 0.3$         | $-2.2 \pm 0.3$        | $-8.6 \pm 0.2$       | $9.1 \pm 0.9$         |
| B <sup>a</sup>         | $2684 \pm 95$        | $2060 \pm 62$         | $2577 \pm 86$          | $3121 \pm 79$         | $329 \pm 44$         | $6040 \pm 259$        |
| R <sup>b</sup>         | 0.998                | 0.998                 | 0.998                  | 0.999                 | 0.974                | 0.997                 |
| $\sigma \cdot 10^{2c}$ | 2.68                 | 1.37                  | 1.66                   | 1.50                  | 0.85                 | 4.96                  |

<sup>a</sup>Parameters of the correlation equation:  $\ln X_2 = A - B/T$ ;

<sup>b</sup>R – pair correlation coefficient;

<sup>c</sup> $\sigma$  – standard deviation;

<sup>d</sup>Data taken from ref. 12;

<sup>e</sup>Data taken from ref. 13.

**Table S2.** Thermodynamic solubility and solvation functions of the compounds **I-VI** in buffer 7.4 at 298 K

|                         | $x_2^{298}$           | $\Delta_{\text{sln}} G^0$<br>kJ·mol <sup>-1</sup> | $\Delta_{\text{sln}} H^0$<br>kJ·mol <sup>-1</sup> | $T\Delta_{\text{sln}} S^0$<br>kJ·mol <sup>-1</sup> | $\Delta_{\text{sln}} S^0$<br>J·mol <sup>-1</sup> ·K <sup>-1</sup> | $\zeta_{Hsln}^a$<br>[%] | $\zeta_{TSsln}^b$<br>[%] | $\Delta_{\text{hyd}} G^0$<br>kJ·mol <sup>-1</sup> | $\Delta_{\text{hyd}} H^0$<br>kJ·mol <sup>-1</sup> | $T\Delta_{\text{hyd}} S^0$<br>kJ·mol <sup>-1</sup> | $\Delta_{\text{hyd}} S^0$<br>J·mol <sup>-1</sup> ·K <sup>-1</sup> | $\zeta_{Hhyd}^c$<br>[%] | $\zeta_{TShyd}^d$<br>[%] |
|-------------------------|-----------------------|---------------------------------------------------|---------------------------------------------------|----------------------------------------------------|-------------------------------------------------------------------|-------------------------|--------------------------|---------------------------------------------------|---------------------------------------------------|----------------------------------------------------|-------------------------------------------------------------------|-------------------------|--------------------------|
| <b>I</b> <sup>c</sup>   | 9.05·10 <sup>-5</sup> | 23.1                                              | 22.3 ± 0.8                                        | -0.8                                               | -2.7 ± 2                                                          | 96.5                    | 3.5                      | -35.2                                             | -101.5                                            | -66.2                                              | -222                                                              | 60.5                    | 39.5                     |
| <b>II</b> <sup>e</sup>  | 3.95·10 <sup>-5</sup> | 25.1                                              | 17.1 ± 0.5                                        | -8.0                                               | -27 ± 2                                                           | 68.1                    | 31.9                     | -37.4                                             | -124.9                                            | -87.5                                              | -294                                                              | 58.8                    | 41.2                     |
| <b>III</b> <sup>e</sup> | 1.79·10 <sup>-5</sup> | 27.1                                              | 21.4 ± 0.7                                        | -5.7                                               | -19 ± 2                                                           | 79.0                    | 21.0                     | -33.1                                             | -131.4                                            | -98.3                                              | -330                                                              | 57.2                    | 42.8                     |
| <b>IV</b> <sup>f</sup>  | 3.09·10 <sup>-6</sup> | 31.5                                              | 25.9 ± 0.7                                        | -5.6                                               | -19 ± 1                                                           | 82.2                    | 17.8                     | -27.1                                             | -133.7                                            | -106.6                                             | -358                                                              | 55.6                    | 44.4                     |
| <b>V</b> <sup>f</sup>   | 6.13·10 <sup>-5</sup> | 24.0                                              | 2.7 ± 0.4                                         | -21.3                                              | -71 ± 11                                                          | 11.3                    | 88.8                     | -35.1                                             | -122.1                                            | -86.9                                              | -291                                                              | 58.4                    | 41.6                     |
| <b>VI</b> <sup>f</sup>  | 1.45·10 <sup>-5</sup> | 27.6                                              | 50.2 ± 2.1                                        | 22.6                                               | 76 ± 5                                                            | 69.0                    | 31.0                     | -44.3                                             | -87.8                                             | -43.5                                              | -146                                                              | 66.9                    | 33.1                     |

$$^a \zeta_{Hsol} = (|\Delta H_{sol}^0| / (|\Delta H_{sol}^0| + |T\Delta S_{sol}^0|)) \cdot 100\% ; ^b \zeta_{TSsol} = (|T\Delta S_{sol}^0| / (|\Delta H_{sol}^0| + |T\Delta S_{sol}^0|)) \cdot 100\% ;$$

$$^c \zeta_{Hhyd} = (|\Delta H_{hyd}^0| / (|\Delta H_{hyd}^0| + |T\Delta S_{hyd}^0|)) \cdot 100\% ; ^d \zeta_{TShyd} = (|T\Delta S_{hyd}^0| / (|\Delta H_{hyd}^0| + |T\Delta S_{hyd}^0|)) \cdot 100\% .$$

<sup>e</sup>Data taken from ref. 12;

<sup>f</sup>Data taken from ref. 13.

**Table S3.** Thermodynamic characteristics of sublimation process of the compounds studied

|                                                          | <b>I<sup>b</sup></b>   | <b>II<sup>b</sup></b>   | <b>III<sup>b</sup></b> | <b>IV<sup>c</sup></b> | <b>V<sup>c</sup></b>  | <b>VI<sup>c</sup></b>  |
|----------------------------------------------------------|------------------------|-------------------------|------------------------|-----------------------|-----------------------|------------------------|
| $\Delta_{sub}G^0$ , kJ·mol <sup>-1</sup>                 | 58.3                   | 62.5                    | 60.2                   | 58.6                  | 59.1                  | 71.9                   |
| $\Delta_{sub}H^T$ , kJ·mol <sup>-1</sup>                 | 121.4 ± 1.1            | 139.3 ± 1.6             | 149.6 ± 2.2            | 157.2 ± 2.1           | 122.0 ± 0.9           | 133.3 ± 0.8            |
| $\Delta_{sub}H^0$ , kJ·mol <sup>-1</sup>                 | 123.8 ± 1.1            | 142.0 ± 1.6             | 152.8 ± 2.2            | 159.6 ± 2.1           | 124.8 ± 0.9           | 138.0 ± 0.8            |
| $C_{p,cr}^{298}$ , J·mol <sup>-1</sup> ·K <sup>-1a</sup> | 288.6                  | 316.2                   | 392.9                  | 349.0                 | 304.4                 | 348.7                  |
| $T_{ref} \cdot \Delta_{sub}S^0$ , kJ·mol <sup>-1</sup>   | 65.5                   | 79.5                    | 92.6                   | 101.0                 | 65.6                  | 66.1                   |
| $\Delta_{sub}S^0$ , J·mol <sup>-1</sup> ·K <sup>-1</sup> | 220 ± 6                | 267 ± 8                 | 311 ± 7                | 339 ± 11              | 220 ± 6               | 222 ± 8                |
|                                                          | <b>VII<sup>d</sup></b> | <b>VIII<sup>d</sup></b> | <b>IX<sup>d</sup></b>  | <b>X<sup>d</sup></b>  | <b>XI<sup>d</sup></b> | <b>XII<sup>d</sup></b> |
| $\Delta_{sub}G^0$ , kJ·mol <sup>-1</sup>                 | 60.8                   | 62.6                    | 64.5                   | 60.2                  | 60.4                  | 57.6                   |
| $\Delta_{sub}H^T$ , kJ·mol <sup>-1</sup>                 | 126.1 ± 2.1            | 116.3 ± 2.5             | 128.9 ± 2.5            | 134.8 ± 1.9           | 112.4 ± 2.1           | 98.9 ± 1.5             |
| $\Delta_{sub}H^0$ , kJ·mol <sup>-1</sup>                 | 129.0 ± 2.1            | 120.7 ± 2.5             | 132.6 ± 2.5            | 137.3 ± 1.9           | 115.6 ± 2.1           | 101.9 ± 1.5            |
| $C_{p,cr}^{298}$ , J·mol <sup>-1</sup> ·K <sup>-1a</sup> | 366.0                  | 344.9                   | 308.3                  | 316.2                 | 308.3                 | 344.9                  |
| $T_{ref} \cdot \Delta_{sub}S^0$ , kJ·mol <sup>-1</sup>   | 68.2                   | 58.1                    | 68.1                   | 77.1                  | 55.2                  | 44.3                   |
| $\Delta_{sub}S^0$ , J·mol <sup>-1</sup> ·K <sup>-1</sup> | 229 ± 8                | 195 ± 8                 | 228 ± 9                | 259 ± 8               | 185 ± 7               | 149 ± 5                |

<sup>a</sup>  $C_{p,cr}^{298}$  has been calculated by additive scheme<sup>S1</sup>;

<sup>b</sup>Data taken from ref. 12;

<sup>c</sup>Data taken from ref. 13;

<sup>d</sup>Data taken from ref. 14.

## References

S1 J. S. Chickos, W. E. Acree Jr. *J. Phys. Chem. Ref. Data.* 2002, **31**, 537 – 698.

**Table S4.** Numerical values of HYBOT physicochemical descriptors used for correlation with the hydration Gibbs energy

| Compound    | $\sum(C_{ad})$ | $\alpha$ | $\sum(C_{ad})/\alpha$ |
|-------------|----------------|----------|-----------------------|
| <b>I</b>    | 8.36           | 25.451   | 0.328                 |
| <b>II</b>   | 8.39           | 27.286   | 0.307                 |
| <b>III</b>  | 9.07           | 29.395   | 0.308                 |
| <b>IV</b>   | 8.29           | 27.013   | 0.307                 |
| <b>V</b>    | 8.31           | 25.360   | 0.328                 |
| <b>VI</b>   | 11.38          | 29.758   | 0.382                 |
| <b>VII</b>  | 9.06           | 27.560   | 0.329                 |
| <b>VIII</b> | 8.41           | 29.214   | 0.288                 |
| <b>IX</b>   | 8.35           | 27.379   | 0.305                 |
| <b>X</b>    | 8.31           | 27.286   | 0.305                 |
| <b>XI</b>   | 8.34           | 27.379   | 0.305                 |
| <b>XII</b>  | 8.48           | 29.214   | 0.290                 |
